# Supplementary material for: Ultra-high gradient performance 3-Tesla MRI for super-fast and high-quality prostate imaging: initial experience
Source: PubMed Central journal article supplement (PMC11607256; doi:10.1186/s13244-024-01862-x), 2024-11-29
Supplement: 13244_2024_1862_MOESM1_ESM.pdf [file 13244_2024_1862_MOESM1_ESM.pdf]

**Ultra-high gradient performance 3 Tesla MRI for super-fast and high-quality prostate imaging: Initial experience**

**ELECTRONIC SUPPLEMENTARY MATERIAL**

**Table S1: Biopsy results**

| <b>PI-RADS Score</b> | <b>Performed fusion Biopsy (n=34)</b> | <b>Confirmed malignancy (n=17)</b> | <b>ISUP grade</b>                                     |
|----------------------|---------------------------------------|------------------------------------|-------------------------------------------------------|
| 1 (n=0)              | -                                     | -                                  | -                                                     |
| 2 (n=36)             | 5 (14)                                | 2 (40)                             | Grade 1: 1 (50)<br>Grade 5: 1 (50)                    |
| 3 (n=10)             | 4 (40)                                | 1 (25)                             | Grade 2: 1 (100)                                      |
| 4 (n=19)             | 16 (84)                               | 10 (63)                            | Grade 1: 4 (40)<br>Grade 2: 5 (50)<br>Grade 5: 1 (10) |
| 5 (n=12)             | 9 (75)                                | 8 (89)                             | Grade 1: 2 (25)<br>Grade 2: 5 (63)<br>Grade 5: 1 (13) |

**Note.**—Dichotomous data is reported as number of participants with percentages in parentheses. ISUP: International Society of Pathology; PI-RADS: Prostate Imaging Reporting and Data System.
